# Supplementary figures and images for: Distinguishing common SARS-CoV2 omicron and recombinant variants with high resolution mass spectrometry
Source: Royal Society of Chemistry journal article supplement (doi:10.1039/d3an01376f), 2023-01-01

# Supplementary Figure 1

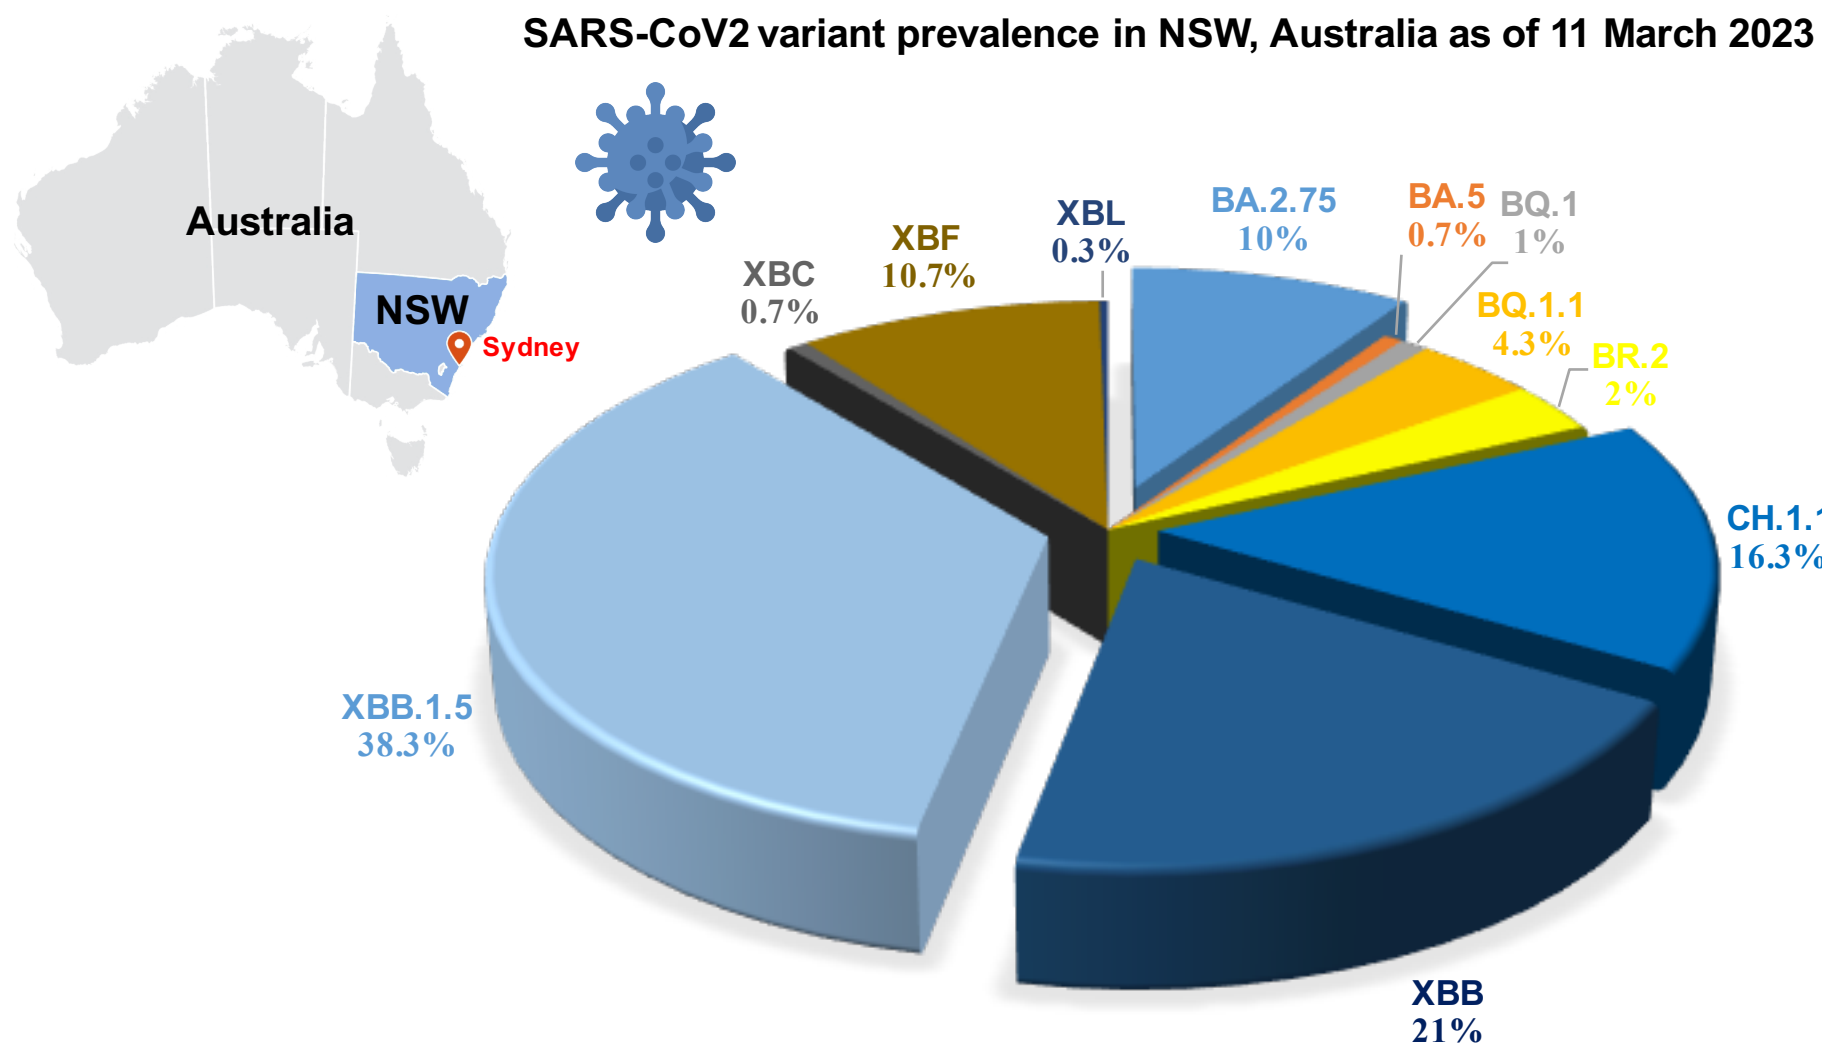

Supplement: d3an01376f1.pdf [file d3an01376f1.pdf]
